# Supplementary material
Source: PubMed Central journal article supplement (PMC4408376)
Supplement: NIHMS679814-supplement-Supplementary_data.pdf [file NIHMS679814-supplement-Supplementary_data.pdf]

SUPPLEMENTARY INFORMATION

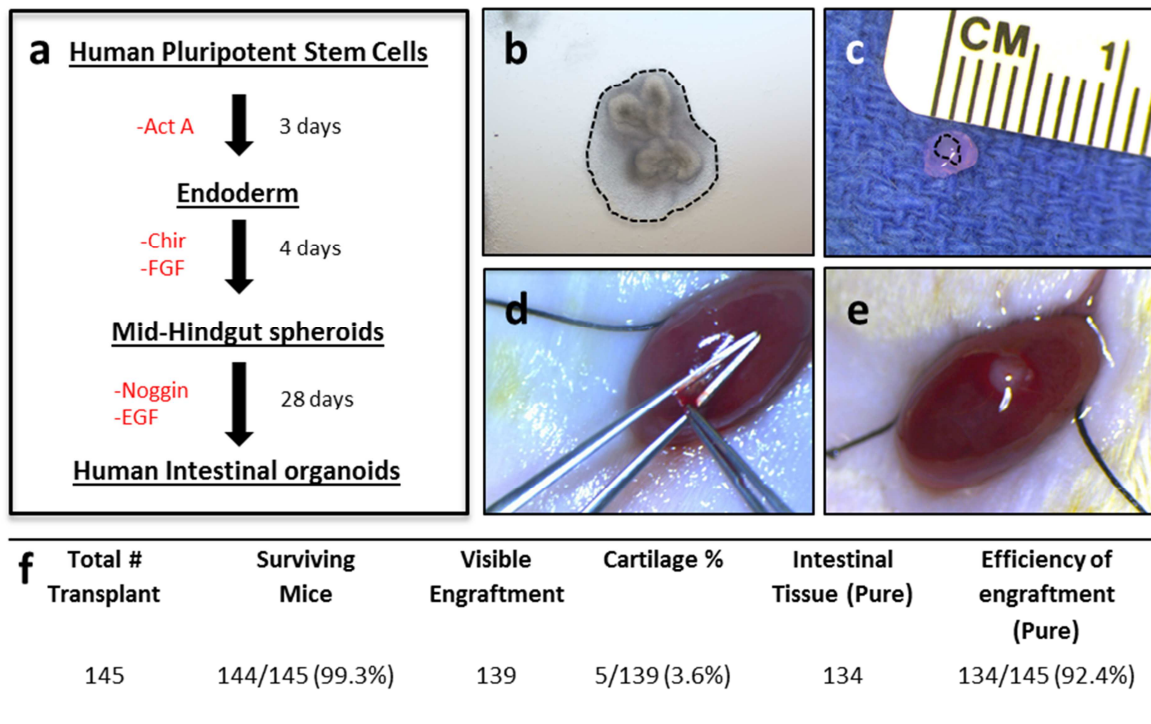

**Supplementary Figure 1: Timeline/Schematic of HIO production, Size and Engraftment Efficiency.** (a) Schematic representing directed differentiation of HIOs from hPSCs over a period of 35 days. (b) Picture of HIO prior to transplant revealing central epithelium and surrounding supporting mesenchyme (outlined). (c) Relative size of one HIO (outlined) embedded in type I collagen prior to transplant. (d) Creation of pocket under kidney capsule using fine forceps. (e) Picture of transplanted HIO under kidney capsule. (f) Table showing efficiency of engraftments at 6 week time point after transplantation.

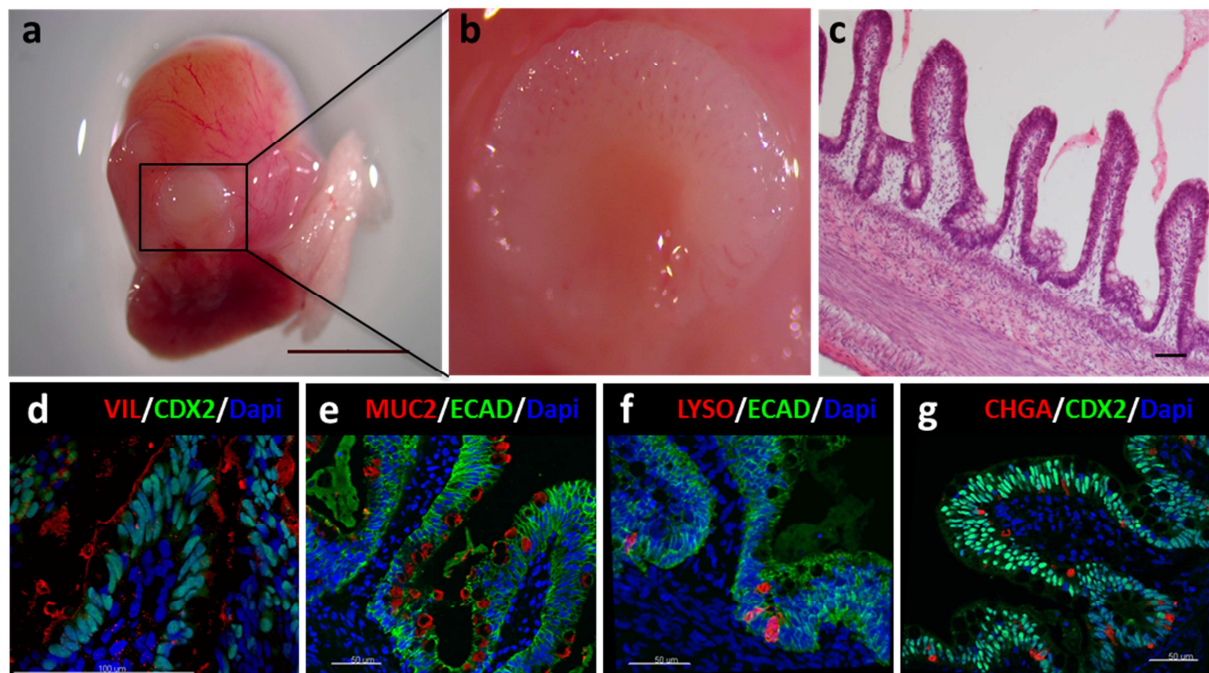

**Supplementary Figure 2: HIOs from induced pluripotent stem cells engraft to form mature human intestinal tissue *in vivo*.** (a) Engraftment 6 weeks after transplant using HIO derived from induced pluripotent stem cells. (b) Magnified image of engraftment revealing luminal surface of engraftment with villi and central capillaries. (c) Magnified H&E of epithelium within engraftment (Scale bar 100  $\mu$ m). Crypt-villus domains were present as well as appropriate layers of sub-epithelium including lamina propria, muscularis mucosa, submucosa, and laminated outer smooth muscle layers. (d-g) All 4 intestinal lineages were present in engraftments including enterocytes (Villin- VIL) (Scale bar 100  $\mu$ m) (d), Goblet cells (Mucin- MUC2) (e), Paneth cells (Lysozyme- LYSO) (f), and enteroendocrine cells (Chromogranin A- CHGA) (g). E-cadherin (ECAD) or CDX2 were used for additional epithelial staining. (All scale bars 50  $\mu$ m except where specified).

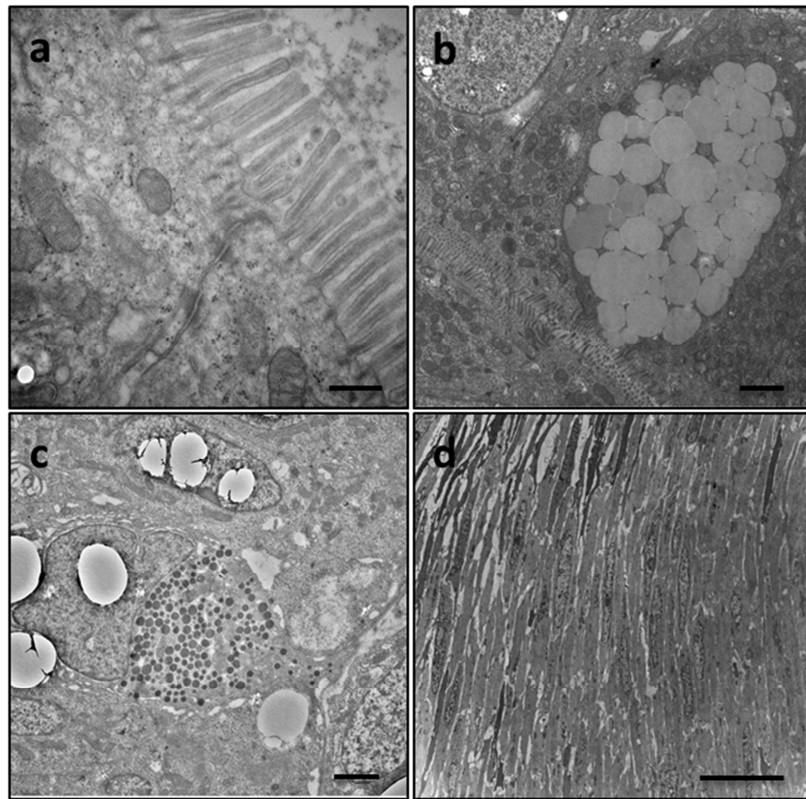

**Supplementary Figure 3: Transmission Electron Microscopy (TEM) of engrafted tissue at 6 weeks.** (a) TEM image of brush border microvilli on the surface of intestinal epithelium. Tight and adherens junctions can also be seen in this image near the apical surface (scale bar 500 nm). (b) TEM image of goblet cell with secretory granules (white) containing mucin (scale bar 2  $\mu\text{m}$ ). (c) TEM image of enteroendocrine cell with secretory granules (dark) ready for release on basolateral aspect of cell (scale bar 2  $\mu\text{m}$ ). (d) TEM image of smooth muscle within engraftment with parallel orientation of smooth muscle fibers (scale bar 10  $\mu\text{m}$ ).

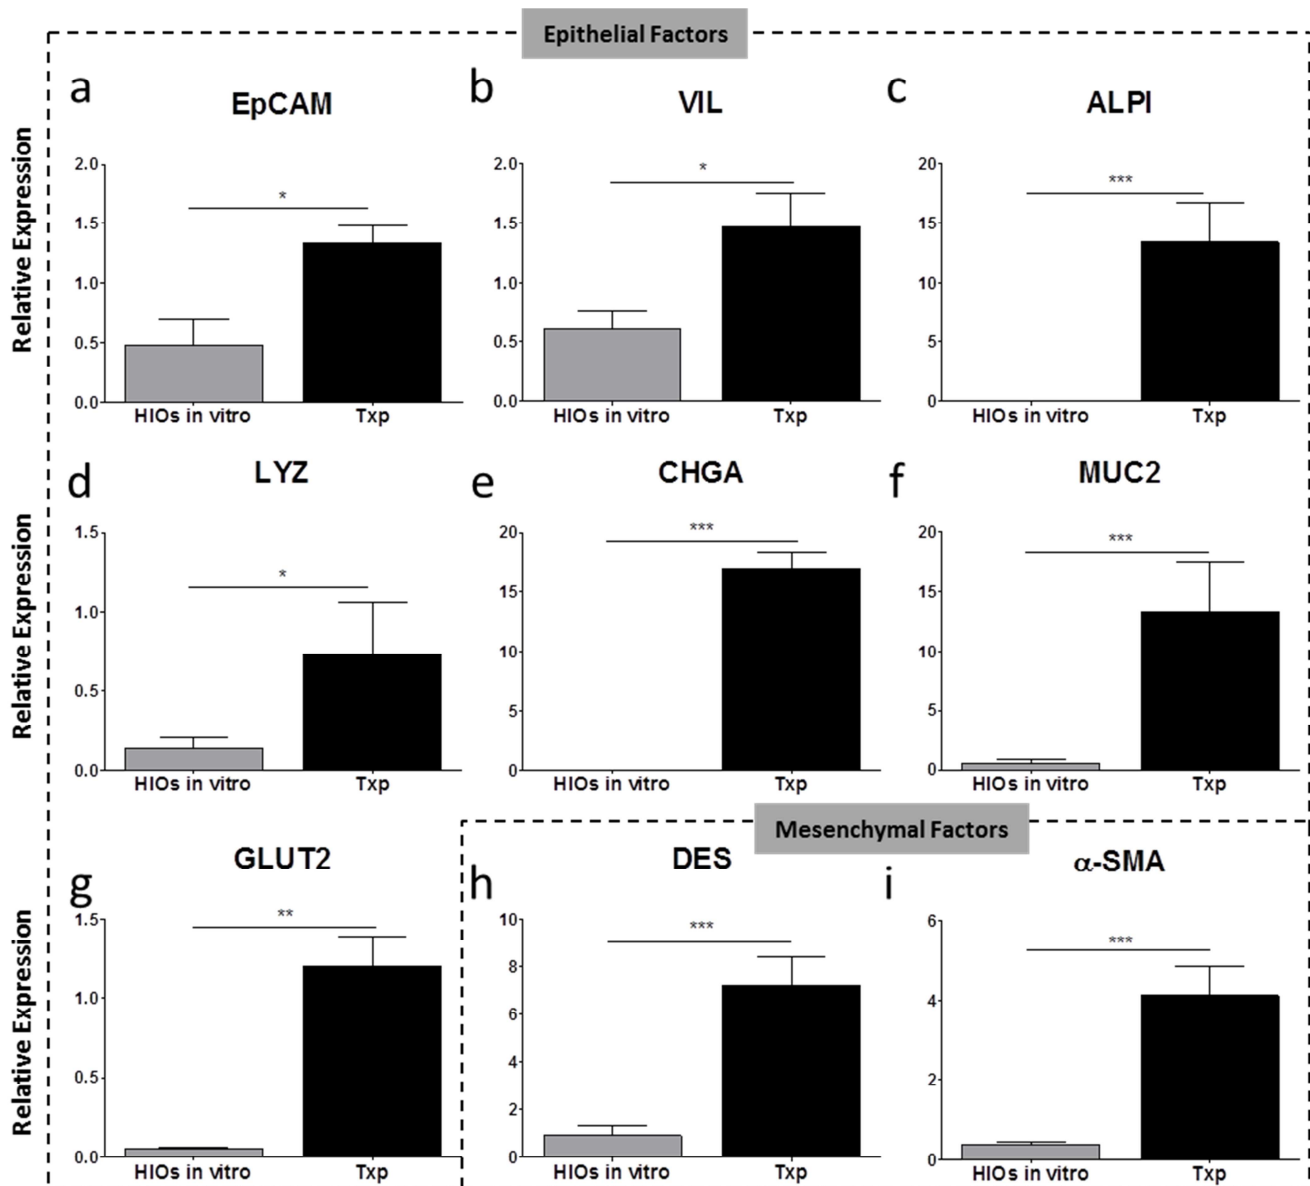

**Supplementary Figure 4: Additional epithelial and mesenchymal markers of maturity in transplanted HIOs vs HIOs *in vitro*.** (a-g) Comparison of relative gene expression of epithelial markers including EpCAM (a), Villin (VIL) (b), Alkaline phosphatase (ALPI) (c), Lysozyme (LYZ) (d), Chromogranin A (CHGA) (e), Mucin (MUC2) (f), and Glucose transporter 2 (GLUT2) (g). (h-i) Relative expression of smooth muscle markers Desmin (DES) (h) and smooth muscle actin ( $\alpha$ -SMA) (i). Values in graphs represent Mean  $\pm$  s.e.m. ns, not significant. \*,  $p < 0.05$ ; \*\*,  $p < 0.01$ ; \*\*\*,  $p < 0.001$ ; HIOs in vitro:  $n=4$ ; Transplants (Txp):  $n=8$ .

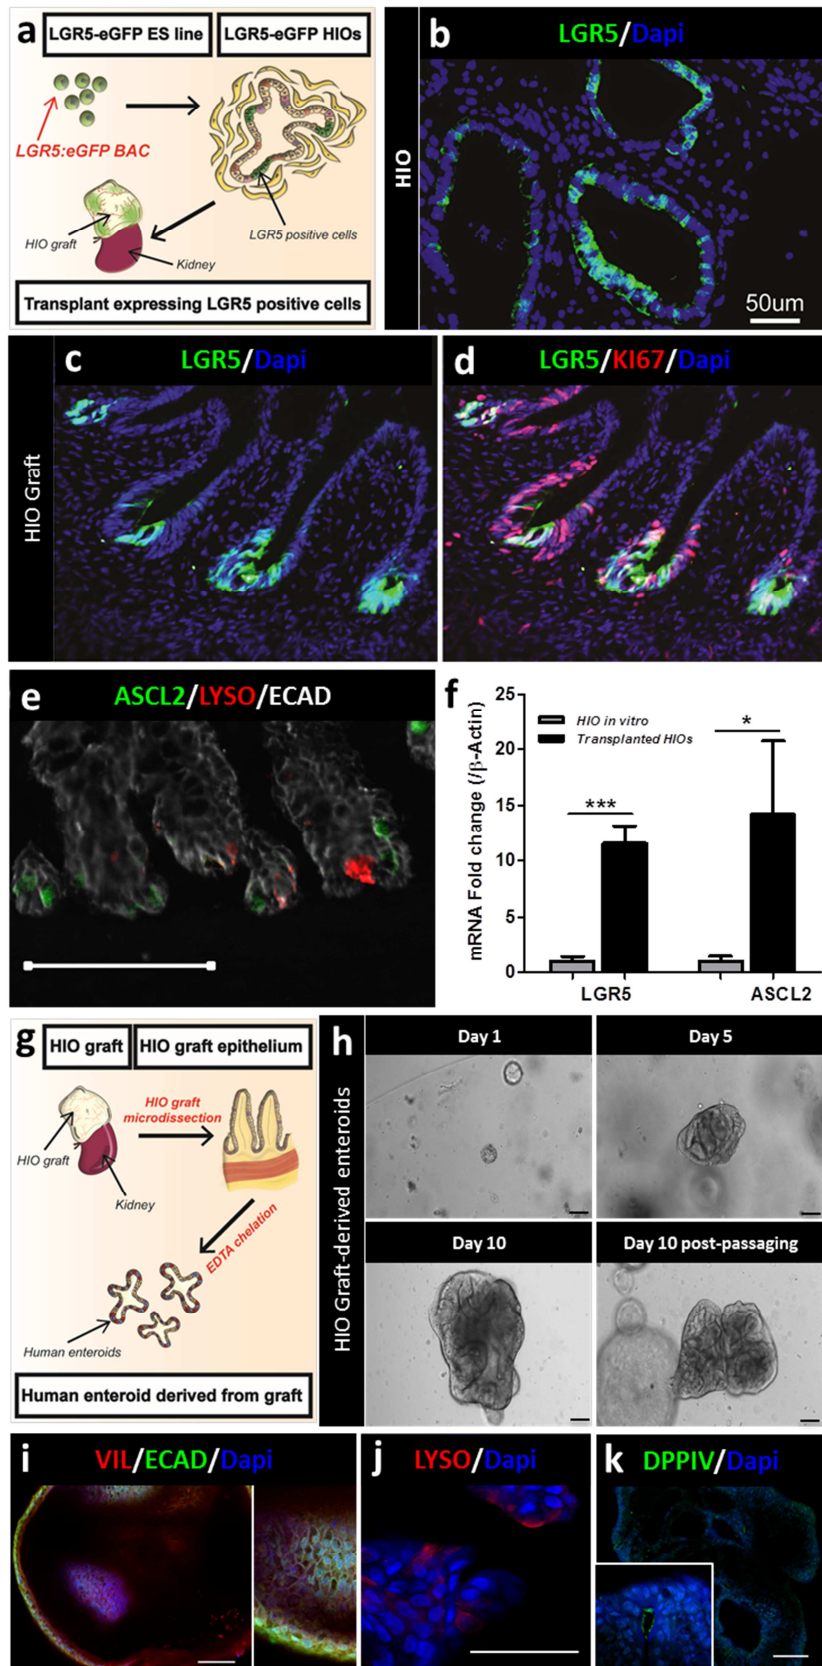

**Supplementary Figure 5: Engrafted tissue displayed a mature epithelium maintained by intestinal stem cells.** (a-d) An LGR5R5:eGFP BAC reporter ES line has been established and was used to generate HIOs expressing LGR5-eGFP cells (a). LGR5-eGFP cells (green) were seen within an HIO *in vitro* scattered throughout the epithelium (b) and are localized in proliferative crypt base cells (colocalization with KI67), as expected in engrafted human intestinal tissue (c-d). (e) Immunofluorescence staining of stem cell marker ASCL2 (green) localized within the crypt bases of the engraftment. (f) Graph demonstrated relative fold changes of LGR5 and ASCL2 within HIOs *in vitro* prior to transplant and in engraftments. (g) Enteroids were generated from the engrafted epithelium to demonstrate the stemness of the tissue. (h) Panel shows Engraftment-derived epithelial enteroids following initial plating at days 1, 5, and 10 and after passaging. (i-k). Immunofluorescence staining revealed the presence of epithelial cells with Villin (VIL) and E-cadherin (ECAD) (i) as well as the presence of Paneth cells (Lysozyme - LYSO) (j) and brush border enzyme (Dipeptidyl peptidase 4 - DPP4) (k) (All scale bars 50  $\mu$ m).

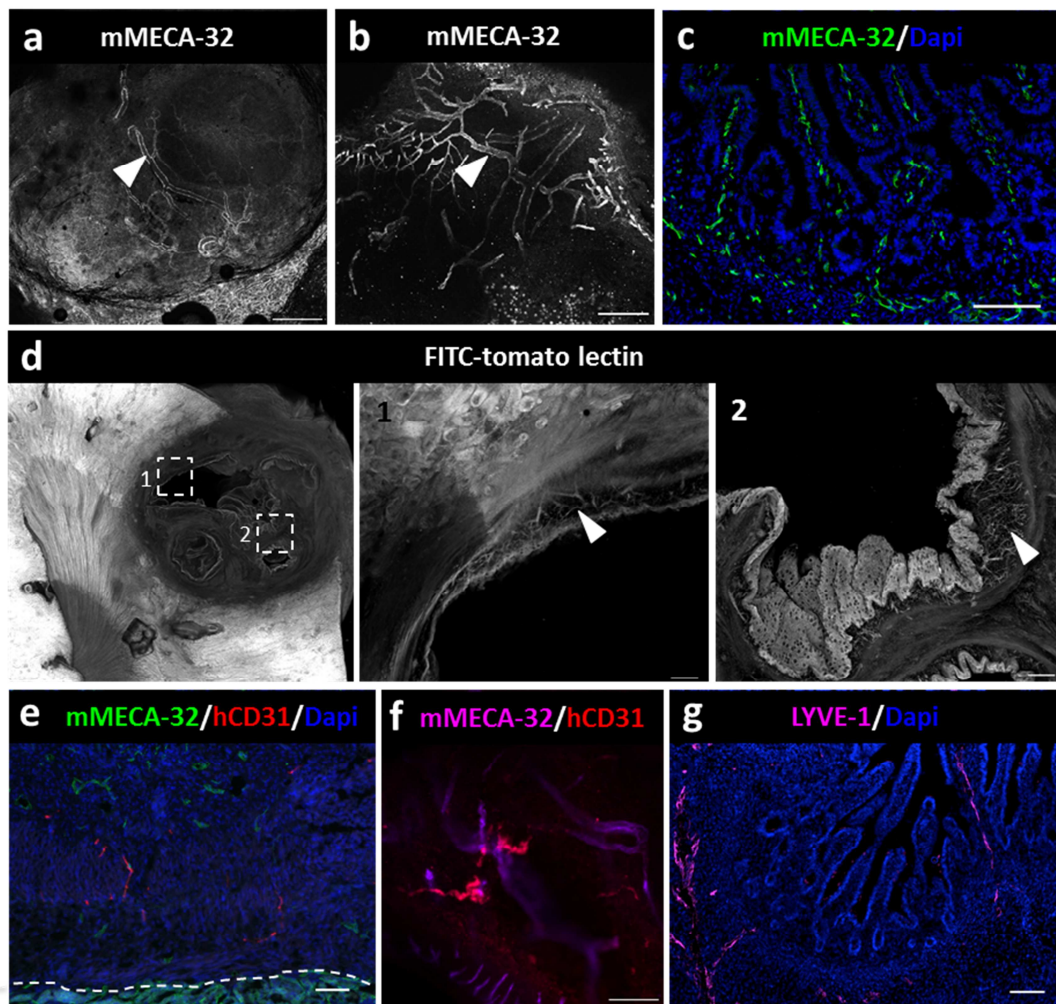

**Supplementary Figure 6: Engrafted intestinal tissue received its blood supply from the ingrowth of murine vasculature.** (a) A panendothelial antibody specific to mouse (mMECA-32) is used to reveal murine vasculature just below the surface of an engraftment (b) as well as within the interior of an engraftment (white arrowheads; Scale bars 50  $\mu$ m). (c) Magnified immunofluorescence image of mMECA-32 stained endothelium (green) comprising the vasculature within each villi as well as the capillary plexus just beneath the epithelium within the engraftment. (d) Whole mount staining of engraftment within the kidney following FITC-labelled tomato lectin injections via mouse tail vein. Outlined areas 1 and 2 correspond with following images revealing functional fluorescent murine vasculature within the engraftments (Scale bars 50  $\mu$ m). (e) Immunofluorescence image revealing murine-specific (mMECA-32) and human specific (hCD31) staining of endothelium within an engraftment. (f) Confocal imaging on whole mount engraftments did not showed connections between the murine and human vasculature. (g) A murine specific marker of lymphatic vessels (LYVE-1) demonstrated ingrowth of lymphatic vessels from the murine host. (All scale bars 100  $\mu$ m except where specified).

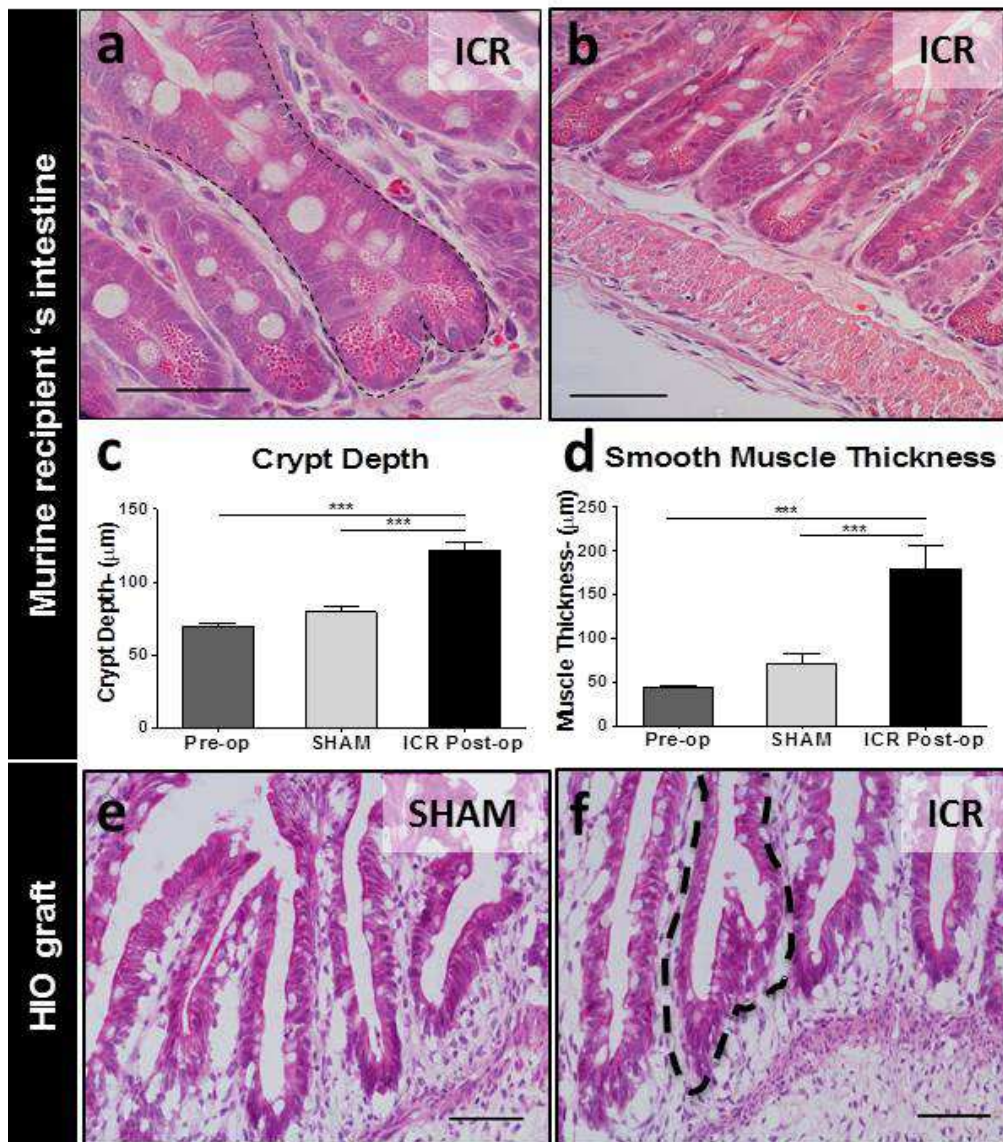

**Supplementary Figure 7: NSG Mice also undergo intestinal adaptation following surgical resection as well as the HIO graft.** (a) Magnified image of crypt fission (outlined) in murine small intestine following resection. (Scale bar 50 μm). (b) Increased thickness of smooth muscle layer (tunica muscularis) in postoperative ICR tissue (Scale bar 50 μm). (c) Comparison in murine intestinal crypt depth (μm) between Pre-operative, sham, and resected (ICR) groups. (d) Comparison of thickness of smooth muscle layer (μm) in Pre-operative, sham, and resected (ICR) groups. (e) Magnified image of intestinal epithelium in HIO graft in a sham mouse (Scale bar 50 μm). (f) Magnified image of crypt fission (outlined) in HIO graft in an ICR mouse (Scale bar 50 μm). Values represented in graphs represent Mean ± s.e.m. ns, not significant. \*, p < 0.05; \*\*, p < 0.01; \*\*\*, p < 0.001; Pre-op group: n=13; sham group: n=10; ICR group: n=11.



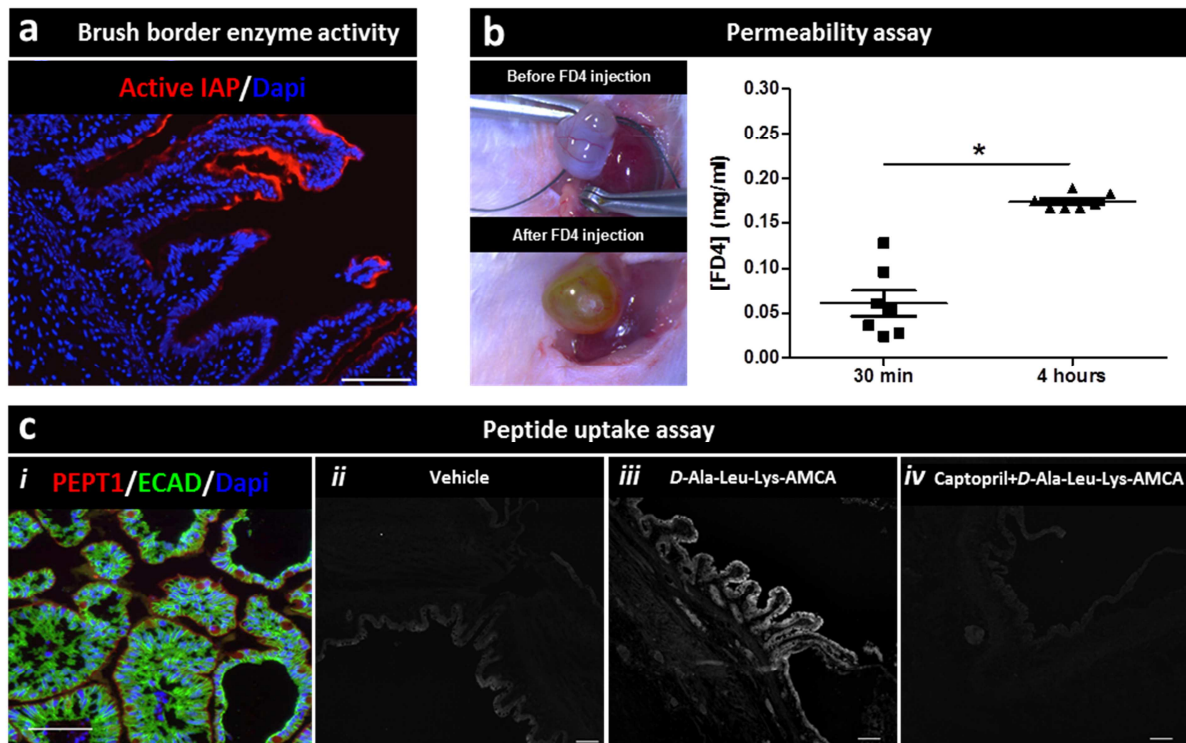

**Supplementary Figure 8: Engrafted human intestinal tissue retained digestive and absorptive function.** (a) Intestinal alkaline phosphatase demonstrated activity *ex vivo* (Scale bar 100  $\mu$ m). (b) FITC-Dextran (MW 4,400) injected into engraftments *in vivo* (pictures seen before and after) increased significantly in murine serum from initial timepoint of 30 minutes compared with timepoint of 4 hours within each mouse ( $n=7$ ). Values represented in graph represent Mean  $\pm$  s.e.m.; ns, not significant; \*,  $p < 0.05$ ; \*\*,  $p < 0.01$ ; \*\*\*,  $p < 0.001$ ; paired t-test. (c) D-Ala-Leu-Lys-AMCA peptide uptake assay revealing peptide transporter (PEPT1) staining within the epithelium of an engraftment (scale bar 100  $\mu$ m) (i). Additional images showing fluorescence within the epithelium following injections of vehicle (DMEM solution), D-Ala-Leu-Lys-AMCA (DMEM + labeled peptide solution), and Captopril + D-Ala-Leu-Lys-AMCA (DMEM + labeled peptide + competitive inhibitor of transport solution) ( $n=3$  for each group). Fluorescence was observed following injection of labeled peptide (iii), but little to no fluorescence was observed with either vehicle injection (ii) or with labeled-peptide + captopril injection (iv).

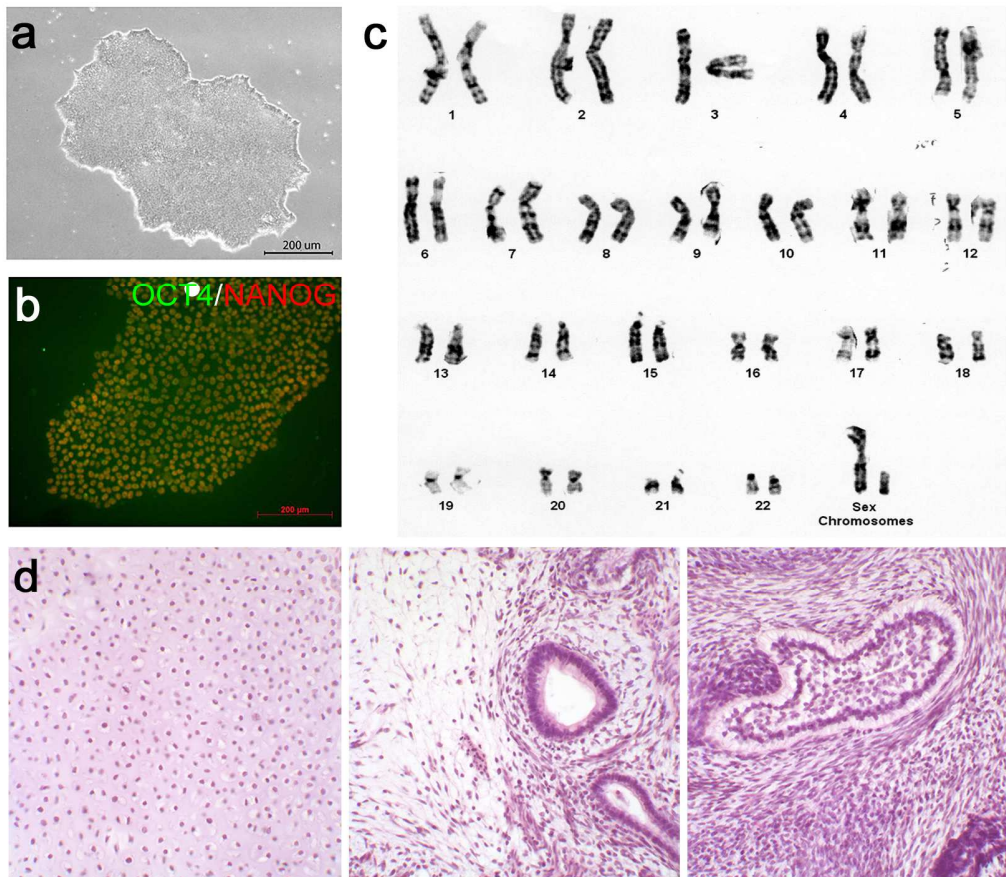

**Supplementary Figure 9: Quality control assays for iPSCs.** (a) Phase contrast image of iPSC colonies cultured in standard feeder free conditions. (b) Immunofluorescence staining of pluripotency markers Oct4 and Nanog in iPSCs. (c) G-banded karyotype analysis demonstrating normal (46,XY) karyotype of control iPSCs. (d) H&E stained sections of a teratoma derived from iPSCs showed tissue arising from the three embryonic germ layers, endoderm, ectoderm and mesoderm. Control teratomas presented stellate reticular cells surrounded by peripheral epithelium with anti-basal nuclei consistent with primitive tooth (ectoderm), ciliated columnar epithelium consistent with intestine (endoderm), and cartilage cells (mesoderm). The images are 400-fold magnification.

**Table S1: List of primary and secondary antibodies used for immunostaining.**

| Provider            | Label  | Host   | Reactivity        | Name                             | Cat. Number | Dilution   |
|---------------------|--------|--------|-------------------|----------------------------------|-------------|------------|
| <b>Primary Ab</b>   |        |        |                   |                                  |             |            |
| Abcam               |        | Goat   | Mouse, Human      | Vimentin (VIM)                   | ab11256     | 1:500      |
| Sigma               |        | Mouse  | Human             | alphaSMA ( $\alpha$ -SMA)        | Ab8207      | Prediluted |
| R&D                 |        | Goat   | Mouse, Human      | E-cadherin (Ecad)                | AF648       | 1:500      |
| R&D                 |        | Rat    | Mouse, Human      | E-cadherin (Ecad)                | MAB 7481    | 1:500      |
| Dako                |        | Rabbit | Human             | Lysozyme (Lyz)                   | A0099       | 1:1000     |
| Immunostar          |        | Rabbit | Mouse, Human      | Chromogranin A (ChgA)            | 20085       | 1:500      |
| Santa-Cruz          |        | Rabbit | Mouse, Human      | Mucin 2 (MUC2)                   | sc-15334    | 1:200      |
| Millipore           | Cy 3   | Mouse  | Human             | Human Nuclear (HuNuc)            | MAB 1281C3  | 1:500      |
| Biogenex            |        | Mouse  | Human             | CDX2-88 (CDX2)                   | AM392       | 1:300      |
| Sigma               |        | Rabbit | Human             | Lactase-gycosylceramidase (LCT)  | HPA007408   | 1:500      |
| Novus Biologicals   |        | Rat    | Mouse             | MECA-32                          | NB100-77668 | 1:500      |
| Santa-Cruz          |        | Goat   | Mouse, Human      | Gastric Inhibitory Peptide (GIP) | sc-23554    | 1:500      |
| Santa-Cruz          |        | Goat   | Mouse, Human      | Villin                           | sc-7672     | 1:100      |
| R&D                 |        | Goat   | Mouse, Human      | DPPIV                            | AF954       | 1:500      |
| DSHB                |        | Mouse  | Human             | Sucrase-Isomaltase (SIM)         | HBB2/614/88 | 1:500      |
| eBioscience         | eF 660 | Rat    | Mouse             | Lyve-1                           | 50-0443     | 1:500      |
| Santa-Cruz          |        | Rabbit | Mouse, Human, Rat | Peptide Transporter 1 (Pept1)    | Sc-20653    | 1:500      |
| Millipore           | FITC   | Mouse  | Human             | Achaete Scute homolog 2 (ASCL2)  | FCMAB285F   | 1:20       |
| Pierce-Thermo       |        | Mouse  | Human             | CD31/PECAM-1                     | MA5-15336   | 1:500      |
| <b>Secondary Ab</b> |        |        |                   |                                  |             |            |
| Invitrogen          | AF488  | Donkey | Goat              | Goat IgG                         | A11055      | 1:500      |
| Invitrogen          | AF555  | Goat   | Rabbit            | Rabbit IgG                       | A21428      | 1:500      |
| Invitrogen          | AF488  | Donkey | Rat               | Rat IgG                          | A21208      | 1:500      |
| Invitrogen          | AF488  | Donkey | Rabbit            | Rabbit IgG                       | A21206      | 1:500      |
| Invitrogen          | AF546  | Donkey | Mouse             | Mouse IgG                        | A10036      | 1:500      |
| Invitrogen          | AF647  | Donkey | Goat              | Goat IgG                         | A21447      | 1:500      |
| Invitrogen          | AF555  | Goat   | Mouse             | Mouse IgG2a                      | A21137      | 1:500      |
| Invitrogen          | AF546  | Donkey | Rabbit            | Rabbit IgG                       | A10040      | 1:500      |
| Invitrogen          | AF555  | Donkey | Goat              | Goat IgG                         | A21432      | 1:500      |
| Invitrogen          | AF488  | Rabbit | Goat              | Goat IgG                         | A11078      | 1:500      |
| Invitrogen          | AF 488 | Donkey | Mouse             | Mouse IgG                        | A21202      | 1:500      |

|                     |        |        |       |           |             |       |
|---------------------|--------|--------|-------|-----------|-------------|-------|
| <b>Invitrogen</b>   | AF 568 | Donkey | Mouse | Mouse IgG | A10037      | 1:500 |
| <b>Jackson-Imm.</b> | Cy5    | Goat   | Rat   | Rat IgG   | 112-175-143 | 1:500 |

**Table S2: List of Human Taqman® Probes used for RT-PCR.**

| <i>Human TaqMan® Probes</i> |                                            |         |               |                |                      |                           |
|-----------------------------|--------------------------------------------|---------|---------------|----------------|----------------------|---------------------------|
| Gene                        | Gene Name                                  | Gene ID | TaqMAN #      | Accession #    | Amplicon Length (bp) | Marker type               |
| <b>ALPI</b>                 | Alkaline Phosphatase, intestinal           | 248     | Hs00357579_g1 | NM_001631.3    | 56                   | Enterocyte                |
| <b>CHGA</b>                 | Chromogranin A                             | 1113    | Hs00900375_m1 | NM_001275.3    | 88                   | Enteroendocrine cell      |
| <b>LYZ</b>                  | Lysozyme                                   | 4069    | Hs00426232_m1 | NM_000239.2    | 67                   | Paneth cell               |
| <b>MUC2</b>                 | Mucin 2                                    | 4583    | Hs03005103_g1 | NM_002457.2    | 53                   | Goblet cell               |
| <b>EpCAM</b>                | Epithelial Cell Adhesion Molecule          | 4072    | Hs00901885_m1 | NM_002354.2    | 95                   | Epithelium/Enterocyte     |
| <b>VIM</b>                  | Vimentin                                   | 7431    | Hs00185584_m1 | NM_003380.3    | 73                   | Mesenchyme/Fibroblast     |
| <b>ACTA2</b>                | alpha-2, Smooth muscle actin               | 59      | Hs00426835_g1 | NM_001141945.1 | 105                  | Smooth Muscle             |
| <b>DES</b>                  | Desmin                                     | 1674    | Hs00157258_m1 | NM_001927.3    | 83                   | Fibroblasts/Smooth Muscle |
| <b>SI</b>                   | Sucrase-Isomaltase (alpha-glucosidase)     | 6467    | Hs00356112_m1 | NM_001041.3    | 64                   | Enterocyte                |
| <b>VILL</b>                 | Villin-like                                | 50853   | Hs00210626_m1 | NM_015873.3    | 74                   | Enterocyte                |
| <b>DPP4</b>                 | Dipeptidyl-peptidase 4                     | 1803    | Hs00175210_m1 | NM_001935.3    | 90                   | Enterocyte                |
| <b>SLC2A2</b>               | Facilitated Glucose Transporter 2 (GLUT 2) | 6514    | Hs01096908_m1 | NM_000340.1    | 65                   | Enterocyte                |
| <b>GIP</b>                  | Gastric Inhibitory Polypeptide             | 2695    | Hs00175030_m1 | NM_004123.2    | 78                   | Proximal                  |
| <b>LCT</b>                  | Lactase                                    | 3938    | Hs00158722_m1 | NM_002299.2    | 79                   | Enterocyte                |
